# Supplementary material for: SARS-CoV-2 Omicron Variants and Their Susceptibility Towards Monoclonal Antibodies in a Swedish Cohort During 2022-23, Studied by Next-Generation Sequencing
Source: Preprints.org preprint supplement (doi:10.20944/preprints202309.0748.v1), 2023-09-12
Supplement: Supplementary file 1 [file supplementary]

**Table S1.** Number of sequences of each Pango lineage in May 2023.

| <b>Pango lineage</b> | <b>Abundance</b> |
|----------------------|------------------|
| BQ.1.25              | 1                |
| CH.1.1.1             | 1                |
| CH.1.1.11            | 2                |
| EG.1                 | 3                |
| EG.1.2               | 5                |
| EU.1.1               | 1                |
| FK.1.2               | 1                |
| FL.1                 | 2                |
| FL.10                | 1                |
| FL.2                 | 1                |
| FL.2.1               | 1                |
| FL.4                 | 1                |
| FL.5                 | 7                |
| FL.9                 | 1                |
| FU.1                 | 1                |
| XBB.1                | 2                |
| XBB.1.16             | 1                |
| XBB.1.16.1           | 5                |
| XBB.1.17.1           | 4                |
| XBB.1.22.2           | 1                |
| XBB.1.5              | 13               |
| XBB.1.5.24           | 12               |
| XBB.1.5.25           | 1                |
| XBB.1.5.31           | 1                |
| XBB.1.5.33           | 1                |
| XBB.1.5.37           | 3                |
| XBB.1.5.38           | 1                |
| XBB.1.5.43           | 1                |
| XBB.1.5.65           | 1                |
| XBB.1.9.1            | 18               |
| XBB.1.9.2            | 2                |
| XBB.2.3              | 1                |
| XBF                  | 3                |
